# Supplementary material
Source: PubMed Central journal article supplement (PMC5989740)

2C

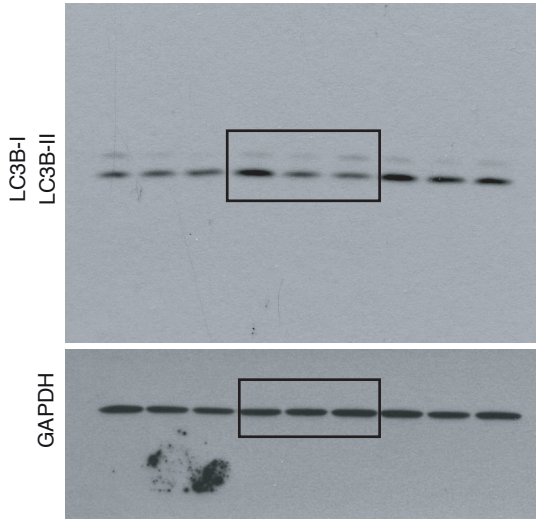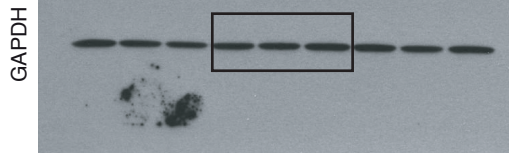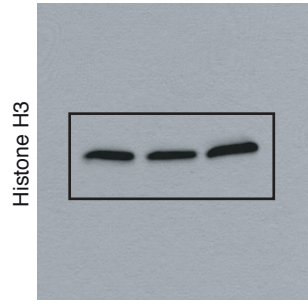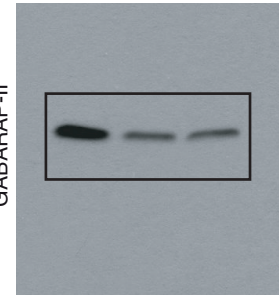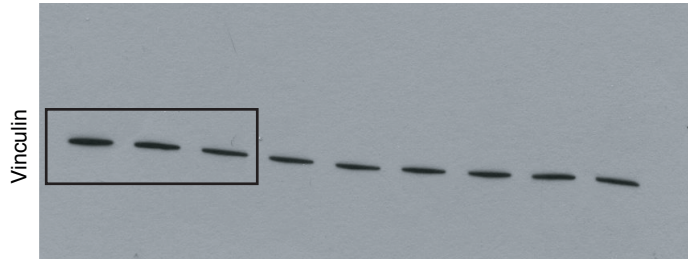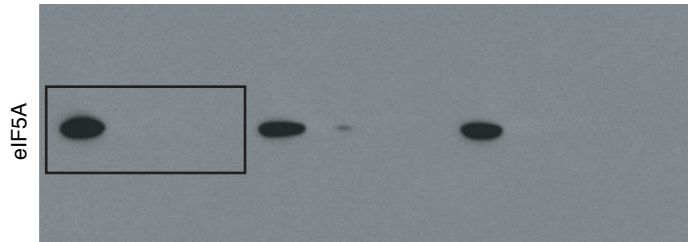

Supplement: EMBR-19-e46072-s006.pdf [file EMBR-19-e46072-s006.pdf]

3A

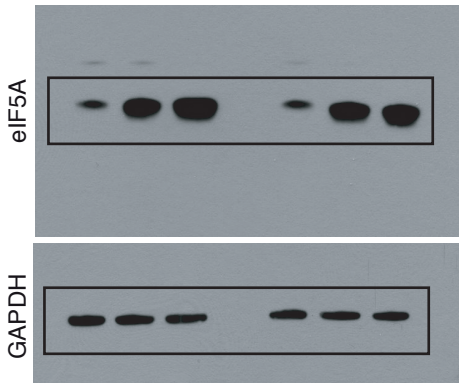

3D

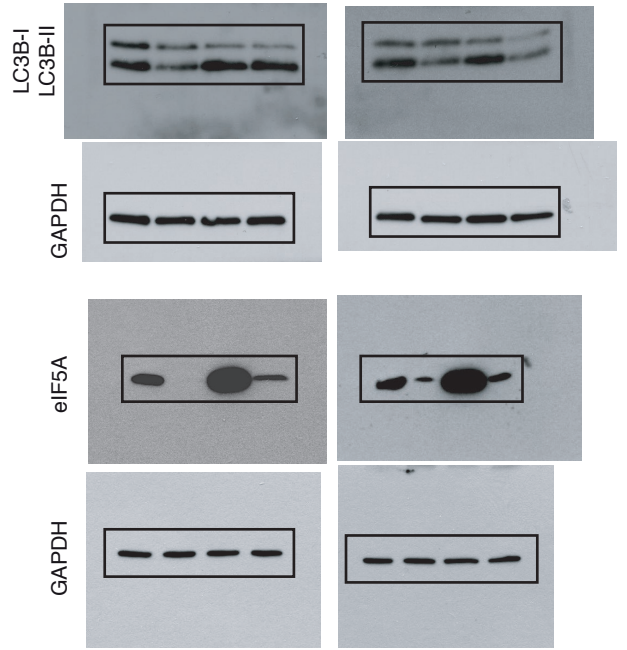

3E

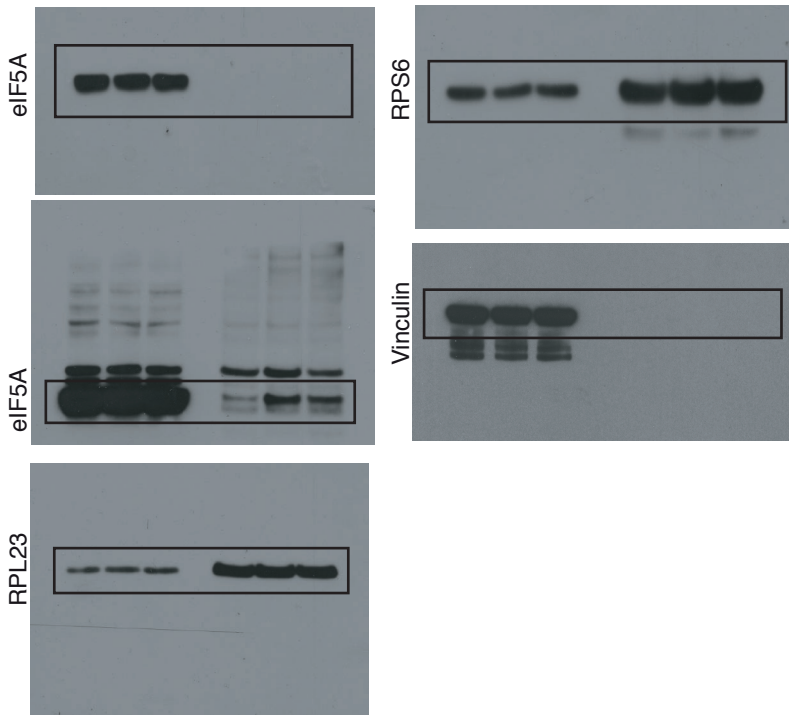

3F

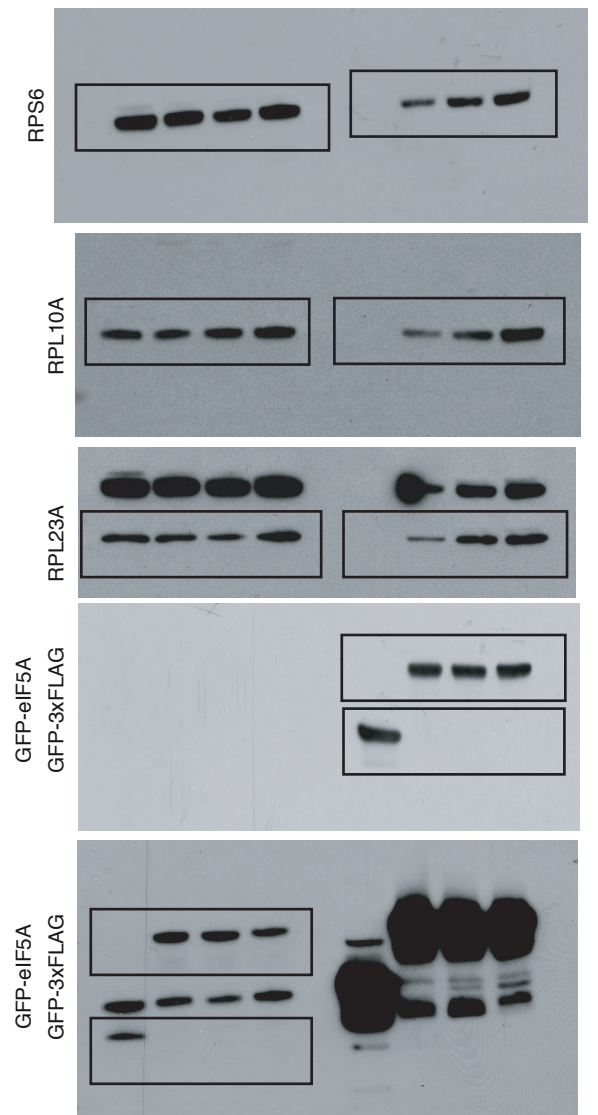

Supplement: EMBR-19-e46072-s007.pdf [file EMBR-19-e46072-s007.pdf]

**5A**

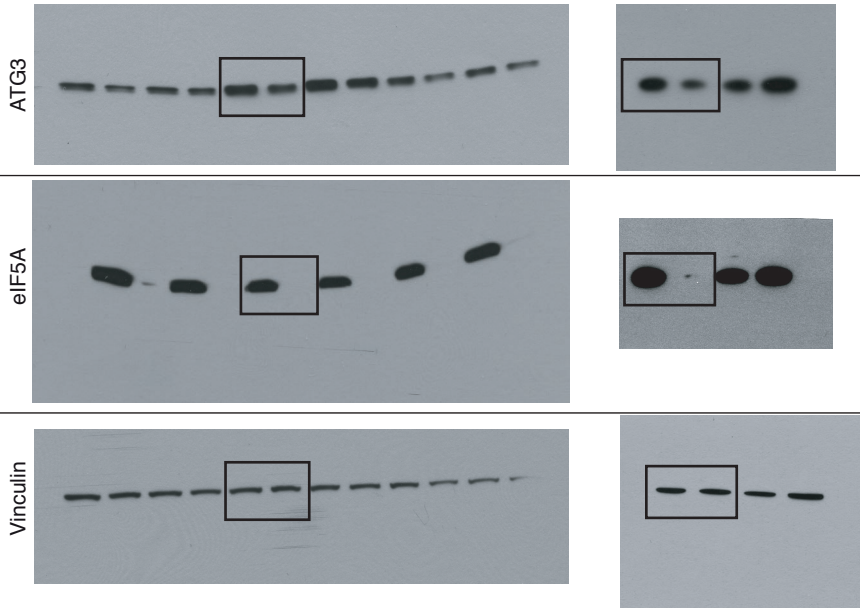

**5B**

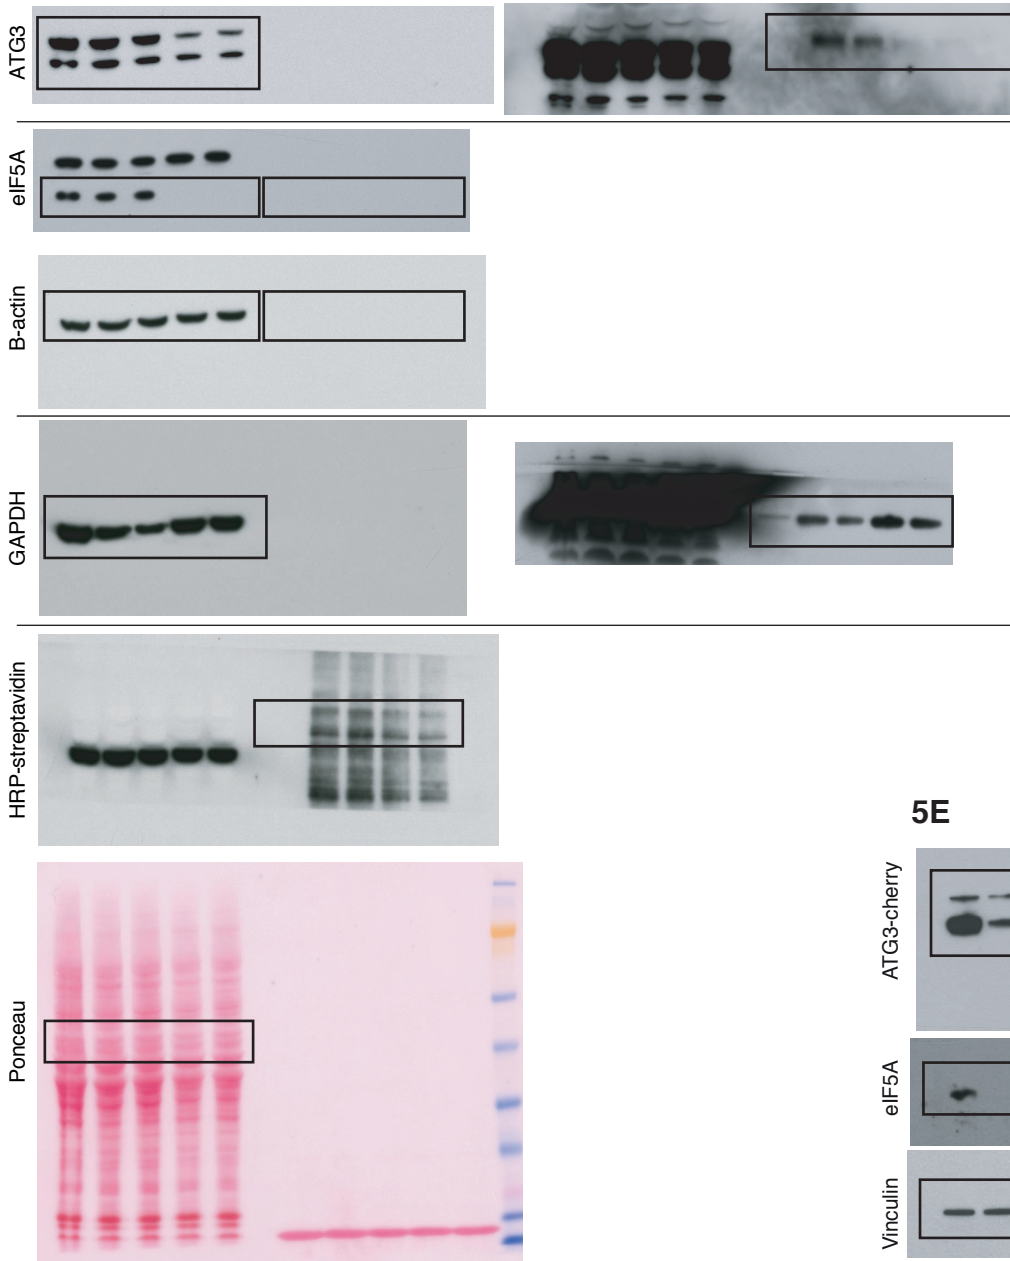

**5C**

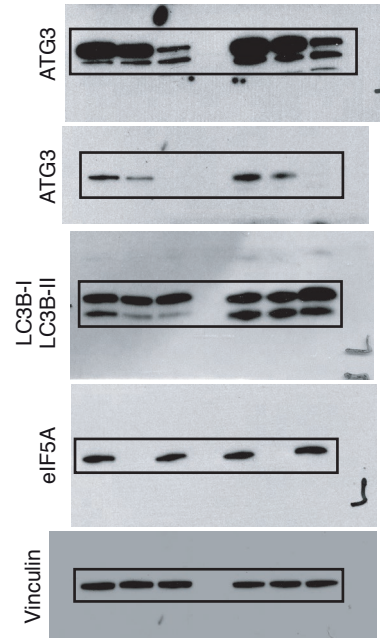

**5E**

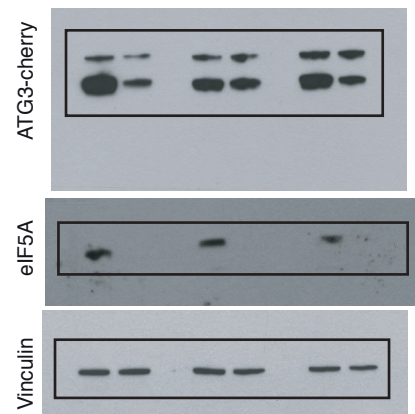

Supplement: EMBR-19-e46072-s008.pdf [file EMBR-19-e46072-s008.pdf]
